# Supplementary material
Source: PubMed Central journal article supplement (PMC10992218)
Supplement: 262_2021_3105_MOESM1_ESM.pdf [file 262_2021_3105_MOESM1_ESM.pdf]

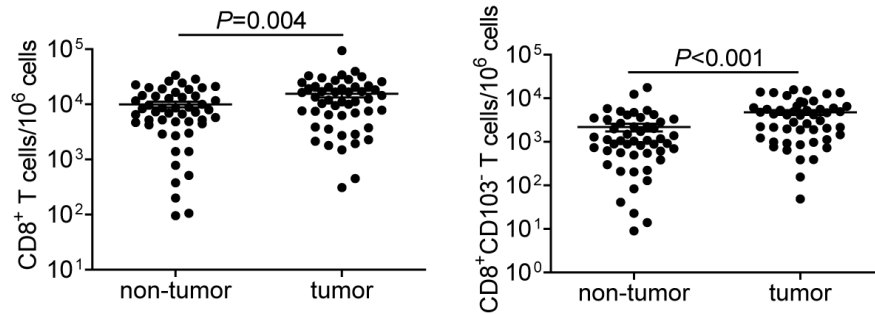

Supplemental Figure 1. The absolute numbers of CD8<sup>+</sup> and CD8<sup>+</sup>CD103<sup>-</sup> T cells in the non-tumor and tumor tissues of the 50 GC patients. Non-tumor and tumor tissue-derived cell suspensions were stained with Fixable Viability Stain 700 (FVS700), anti-CD45, CD3, CD8 and CD103 antibodies, then FVS700<sup>-</sup>CD45<sup>+</sup>CD3<sup>+</sup>CD8<sup>+</sup> cells (CD8<sup>+</sup> T cells) and FVS700<sup>-</sup>CD45<sup>+</sup>CD3<sup>+</sup>CD8<sup>+</sup>CD103<sup>-</sup> cells (CD8<sup>+</sup>CD103<sup>-</sup> T cells) per million cells were analyzed.  $P < 0.05$  was considered as statistically significant.

Supplemental Table 1. Clinical Characteristics of 155 GC Patients

| Variables                                 | No. of patients<br>(group 1) | No. of patients<br>(group 2) |
|-------------------------------------------|------------------------------|------------------------------|
| Sex (male/female)                         | 31/19                        | 83/22                        |
| Age (y), median (range)                   | 61, 30-86                    | 62, 27-79                    |
| Tumor size (cm; <5/≥5)                    | 36/14                        | 84/21                        |
| Neural invasion (absent/present)          | 35/15                        | 91/14                        |
| Vascular invasion (absent/present)        | 39/11                        | 89/16                        |
| Tumor (T) invasion (T1+T2/T3+T4)          | 23/27                        | 25/80                        |
| Lymphoid nodal (N) status (N0 / N1+N2+N3) | 28/22                        | 41/64                        |
| Distant metastasis (M) status (M0/M1)     | 49/1                         | 100/5                        |
| TNM stage ( I + II /III+IV)               | 32/18                        | 45/60                        |

Supplemental Table 2. Fluorochrome-conjugated antibodies used in flow cytometry.

| Antibodies                                  | Source        |
|---------------------------------------------|---------------|
| Fixable Viability Stain 700                 | BD Pharmingen |
| APC-H7 conjugated anti-human CD3            | BD Pharmingen |
| APC conjugated anti-human CD103             | Biolegend     |
| Alexa Fluor 488-conjugated anti-human GITR  | Biolegend     |
| Alexa Fluor 488-conjugated anti-human LAG-3 | Biolegend     |
| Alexa Fluor 488-conjugated anti-human Ki-67 | Biolegend     |
| Brilliant Violet 605 anti-human CD69        | Biolegend     |
| FITC-conjugated anti-human CD45RA           | Biolegend     |
| FITC-conjugated anti-human CD28             | Biolegend     |
| FITC-conjugated anti-human CD127            | Biolegend     |
| FITC-conjugated anti-human CD39             | Biolegend     |
| FITC-conjugated anti-human Tim-3            | Biolegend     |
| FITC-conjugated anti-human 2B4              | Biolegend     |
| FITC-conjugated anti-human BTLA             | Biolegend     |
| FITC-conjugated anti-human TNF- $\alpha$    | Biolegend     |
| FITC-conjugated anti-human granzyme A       | Biolegend     |
| FITC-conjugated anti-human granzyme B       | Biolegend     |
| PE-conjugated anti-human CCR7               | Biolegend     |
| PE-conjugated anti-human CD27               | Biolegend     |
| PE-conjugated anti-human KLRG1              | Biolegend     |
| PE-conjugated anti-human 4-1BB              | Biolegend     |
| PE-conjugated anti-human OX40               | Biolegend     |
| PE-conjugated anti-human CD73               | Biolegend     |
| PE-conjugated anti-human PD-1               | Biolegend     |
| PE-conjugated anti-human TIGIT              | Biolegend     |
| PE-conjugated anti-human IFN- $\gamma$      | Biolegend     |
| PE-conjugated anti-human granzyme K         | Biolegend     |
| PE-conjugated anti-human granzysin          | Biolegend     |
| PE-conjugated anti-human perforin           | Biolegend     |
| PE-Cy7-conjugated anti-human CD45           | Biolegend     |
| PerCP-Cy5.5-conjugated anti-human CD8       | Biolegend     |

Supplemental Table 3. Univariate and Multivariate Analyses of Factors Associated With Survival and Recurrence

| Variables                                                      | Overall Survival |              |              |          | Disease-free Survival |              |              |          |
|----------------------------------------------------------------|------------------|--------------|--------------|----------|-----------------------|--------------|--------------|----------|
|                                                                | Univariate       | Multivariate |              |          | Univariate            | Multivariate |              |          |
|                                                                | <i>P</i>         | HR           | 95.0% CI     | <i>P</i> | <i>P</i>              | HR           | 95.0% CI     | <i>P</i> |
| Sex (male vs. female)                                          | 0.130            |              |              | NA       | 0.131                 |              |              | NA       |
| Age, years ( $\geq 62$ vs. $< 62$ )                            | 0.279            |              |              | NA       | 0.315                 |              |              | NA       |
| Tumor size, cm ( $\geq 5$ vs. $< 5$ )                          | 0.001            | 0.454        | 0.219-0.943  | 0.034    | 0.002                 | 0.495        | 0.238-1.031  | 0.060    |
| Histologic type (diff vs. undiff)                              | 0.102            |              |              | NA       | 0.116                 |              |              | NA       |
| Neural invasion (present vs. absent)                           | 0.002            | 1.894        | 0.795-4.511  | 0.149    | 0.001                 | 2.025        | 0.839-4.883  | 0.116    |
| Vascular invasion (present vs. absent)                         | 0.009            | 1.663        | 0.702-3.940  | 0.247    | 0.007                 | 1.884        | 0.786-4.514  | 0.156    |
| Tumor (T) invasion (T1+T2 vs. T3+T4)                           | 0.012            | 1.433        | 0.234-8.766  | 0.697    | 0.012                 | 1.455        | 0.238-8.889  | 0.685    |
| Lymphoid nodal (N) status (N0 vs. N1+N2+N3)                    | 0.014            | 0.529        | 0.179-1.570  | 0.251    | 0.013                 | 0.602        | 0.206-1.756  | 0.353    |
| Distant metastasis (M) status (M0 vs. M1)                      | 0.017            | 3.393        | 0.978-11.779 | 0.054    | 0.007                 | 4.650        | 1.307-16.541 | 0.018    |
| TNM stage (I+II vs. III+IV)                                    | <0.001           | 3.506        | 0.771-15.932 | 0.104    | <0.001                | 3.011        | 0.665-13.632 | 0.152    |
| CD8 <sup>+</sup> CD103 <sup>+</sup> cell number (high vs. low) | 0.005            | 2.205        | 1.005-4.841  | 0.049    | 0.003                 | 2.302        | 1.044-5.076  | 0.039    |

NOTE: Cox proportional hazards regression model. Variables used in multivariate analysis were adopted by univariate analysis. TNM, tumor node metastasis; diff, differentiation; undiff, undifferentiation; CI, confidence interval; HR, hazard ratio; NA, not adopted.
